# Supplementary material for: The Longitudinal Association between Co-Residential Care Provision and Healthcare Use among the Portuguese Population Aged 50 and Over: A SHARE Study
Source: MDPI journal article supplement (doi:10.3390/ijerph20053975), 2023-02-23
Supplement: s1 [file s1]

Table S1- Statistic values of the Variance Inflation Factor (VIF) and Tolerance for Model 2.

| <b>Model 2</b>                     | <b>VIF</b> | <b>95% CI</b> | <b>Tolerance</b> | <b>95% CI</b> |
|------------------------------------|------------|---------------|------------------|---------------|
| Co-residential care                | 1.06       | [1.03-1.11]   | 0.95             | [0.90-0.97]   |
| Gender                             | 1.12       | [1.09-1.18]   | 0.89             | [0.85-0.92]   |
| Age                                | 1.62       | [1.55-1.70]   | 0.62             | [0.59-0.65]   |
| Education (ISCED)                  | 1.27       | [1.22-1.32]   | 0.79             | [0.75-0.82]   |
| Current job situation              | 1.50       | [1.44-1.58]   | 0.67             | [0.63-0.70]   |
| Financial distress                 | 1.16       | [1.12-1.21]   | 0.86             | [0.83-0.90]   |
| Chronic diseases                   | 1.19       | [1.15-1.24]   | 0.84             | [0.80-0.87]   |
| Depressive symptoms                | 1.18       | [1.14-1.24]   | 0.85             | [0.81-0.88]   |
| Physical inactivity                | 1.13       | [1.09-1.18]   | 0.89             | [0.85-0.92]   |
| Hospitalized in the last 12 months | 1.03       | [1.01-1.10]   | 0.97             | [0.91-0.99]   |
| Household size                     | 1.06       | [1.03-1.12]   | 0.94             | [0.90-0.97]   |
| Social activities                  | 1.21       | [1.17-1.27]   | 0.82             | [0.79-0.86]   |
| Time                               | 1.09       | [1.06-1.14]   | 0.92             | [0.88-0.95]   |

Table S2 - Longitudinal association between co-residential care provision and healthcare use among the Portuguese population aged 50 and over (Model 4: interaction term between *providing co-residential care* and *gender*)

| Model 4                                                  |                    |           |
|----------------------------------------------------------|--------------------|-----------|
|                                                          | IRR (95% CI)       | P - Value |
| (Intercept)                                              | 1.69 (1.21 - 2.36) | 0.002     |
| Co-residential care                                      |                    |           |
| Non-co-residential caregivers                            | ref.               |           |
| Co-residential spousal caregivers                        | 0.95 (0.78-1.15)   | 0.591     |
| Non-spousal co-residential caregivers                    | 1.02 (0.85-1.21)   | 0.860     |
| Age                                                      | 1.00 (1.00-1.01)   | 0.127     |
| Sex (Male)                                               | 0.93 (0.85 - 1.01) | 0.076     |
| Current job situation (Retired)                          | 1.05 (0.96 - 1.14) | 0.325     |
| Education (ISCED)                                        |                    |           |
| Low education level                                      | ref.               |           |
| Medium education level                                   | 1.02 (0.89 - 1.17) | 0.765     |
| High education level                                     | 1.24 (1.09 - 1.42) | 0.001     |
| Financial distress (Yes)                                 | 1.07 (0.99 - 1.15) | 0.107     |
| Hospitalized in the last 12 months (Yes)                 | 1.71 (1.56 - 1.89) | <0.001    |
| Chronic diseases                                         | 1.14 (1.12 - 1.16) | <0.001    |
| Depressive symptoms (4 or more) (Yes)                    | 1.26 (1.17 - 1.35) | <0.001    |
| Physical inactivity (Yes)                                | 1.15 (1.06 - 1.25) | 0.001     |
| Household size                                           | 0.97 (0.94 - 1.00) | 0.054     |
| Social activities                                        | 0.98 (0.96 - 1.01) | 0.254     |
| Time (wave)                                              | 1.07 (1.04 - 1.10) | <0.001    |
| Spouse co-residential caregiver * Gender                 | 1.07 (0.82 - 1.40) | 0.612     |
| Co-residential caregiver of other than a spouse * Gender | 0.94 (0.69 - 1.28) | 0.689     |
| Random Effects                                           |                    |           |
| σ (intercept)                                            | 0.3126             |           |
| Goodness-of-fit                                          |                    |           |
| AIC                                                      | 16250              |           |
| Deviance                                                 | 16210              |           |
| Log-Likelihood                                           | -8105              |           |
| ICC                                                      | 0.406              |           |
| Nº of observations                                       | 3142               |           |
| Nº of individuals                                        | 1928               |           |
